# Supplementary material
Source: Springer Nature journal article supplement (https://www.springermedizin.de/resource/supplementary/13054_2013_2969_MOESM1_ESM.pdf/9712000)
Supplement: MOESM1 [file 9712000]

**Additional file 1:**

**Codes for diagnoses, procedures, blood tests, and drugs**

**Preadmission morbidity. Diagnosis codes according to the International Classification of Diseases, 8<sup>th</sup> (ICD-8) and 10<sup>th</sup> revision (ICD-10).**

|                                                   | ICD-8    | ICD-10                                                                                                                     |
|---------------------------------------------------|----------|----------------------------------------------------------------------------------------------------------------------------|
| Diabetes                                          | 249, 250 | E10–E14, O24 (except O24.4), G63.2, H36.0, N08.3                                                                           |
| Myocardial infarction                             | *        | I21, I22, I23                                                                                                              |
| Congestive heart failure                          | *        | I50, I11.0, I13.0, I13.2                                                                                                   |
| Kidney disease (Moderate to severe renal disease) | *        | I12, I13, N00–N05, N07, N11, N14, N18–N19, Q61                                                                             |
| Dementia                                          | *        | F00–F03, F05.1, G30                                                                                                        |
| Chronic pulmonary diseases                        | *        | J40–J47, J60–J67, J68.4, J70.1, J70.3, J84.1, J92.0, J96.1, J98.2, J98.3                                                   |
| Connective tissue disease                         | *        | M05, M06, M08, M09, M30, M31, M32, M33, M34, M35, M36, D86                                                                 |
| Liver disease                                     | *        | B18, K70.0–K70.3, K70.9, K71, K73, K74, K76.0<br>B15.0, B16.0, B16.2, B19.0, K70.4, K72, K76.6, I85                        |
| Cancer (solid tumor, leukemia, lymphoma)          | *        | C00–C75 (without C44)<br>C91–C95<br>C81–C85, C88, C90, C96                                                                 |
| Metastatic cancer                                 | *        | C76–C80                                                                                                                    |
| Obesity                                           | *        | E66                                                                                                                        |
| Alcoholism                                        | *        | F10 (except F10.0), G31.2, G62.1, G72.1, I 42.6, K29.2, K86.0, Z72.1 (Or prescription for disulfiram. See drug code below) |
| Polycystic ovarian syndrome                       | *        | E28.2                                                                                                                      |
| Diabetic retinopathy                              | *        | H36.0, E10.3, E11.3, E12.3, E13.3, E14.3                                                                                   |
| Diabetic nephropathy                              | *        | N08.3, E10.2, E11.2, E12.2, E13.2, E14.2                                                                                   |

\*Not applicable because only morbidity within five years before admission was included. (Covered by ICD-10)

---

**Primary diagnosis during current hospitalization (diagnostic category), according to the International Classification of Diseases, 10<sup>th</sup> edition.**

---

|                                         | <b>ICD-10</b>                                                                                                                                                                                                                                                                                                                                    |
|-----------------------------------------|--------------------------------------------------------------------------------------------------------------------------------------------------------------------------------------------------------------------------------------------------------------------------------------------------------------------------------------------------|
| Pneumonia                               | J12–J18, A48.1, A70.9                                                                                                                                                                                                                                                                                                                            |
| Septicemia                              | A39.2, A40, A41, A42.7, B37.7                                                                                                                                                                                                                                                                                                                    |
| Infectious diseases excluding pneumonia | A00–B99 (without A48.1, A70.9), G00–G07, I00–I02, I30.1, I32.0, I33, I38, I40.0, J00–J06, J36, J39.0, J10–J11, J20–J22, J85.1, J86, K35, K37, K57.0, K57.2, K57.4, K57.8, K61, K63.0, K65.0, K65.9, K67, K75.0, K75.1, K80.0, K80.3, K80.4, K81.0, K81.9, K83.0, L00–L03, L05–L08, M00, M01, M86, N10, N12, N15.1, N30, N39.0, N41, N45, N70–N77 |
| Diabetes                                | E10–E14, O24 (except O24.4), G63.2, H36.0, N08.3                                                                                                                                                                                                                                                                                                 |
| Endocrinology excluding diabetes        | E00–E90 (without E10–E14)                                                                                                                                                                                                                                                                                                                        |
| Cardiovascular diseases                 | I00–I99 without I00–I02, I30.1, I32.0, I33, I38, I40.0                                                                                                                                                                                                                                                                                           |
| Respiratory diseases                    | J00–J99 without J00–J06, J36, J39.0, J10–J11, J12–J18, J20–J22, J85.1, J86                                                                                                                                                                                                                                                                       |
| Gastrointestinal and liver disease      | K00–K99 without K35, K37, K57.0, K57.2, K57.4, K57.8, K61, K63.0, K65.0, K65.9, K67, K75.0, K75.1, K80.0, K80.3, K80.4, K81.0, K81.9, K83.0                                                                                                                                                                                                      |
| Cancer                                  | C00–D89                                                                                                                                                                                                                                                                                                                                          |
| Trauma and poisoning                    | S00–T98                                                                                                                                                                                                                                                                                                                                          |
| Other                                   | all codes not included in other categories                                                                                                                                                                                                                                                                                                       |
| Lactic acidosis                         | E87.2A                                                                                                                                                                                                                                                                                                                                           |

---

**Surgical procedures**

---

Surgery All surgical codes (K-codes) in the Nordic Medico-Statistical Committee (NOMESCO) Classification of Surgical Procedures.

---

---

**Drug codes according to Anatomical Therapeutic Classification (ATC).**

---

| <b>Drug name (generic)</b> | <b>ATC code</b>                    |
|----------------------------|------------------------------------|
| All antidiabetic drugs     | A10A, A10B                         |
| - Insulin                  | A10A                               |
| - Metformin                | A10BA02                            |
| - Sulfonylureas            | A10BB, A10BC                       |
| - Other antidiabetic drugs | A10B without A10BA02, A10BB, A10BC |
| Low-dose aspirin           | B01AC06                            |
| Beta-blockers              | C07                                |
| Statins                    | C10AA                              |
| Disulfiram                 | N07BB01                            |

---

**Blood test codes (Nomenclature for Properties and Units (NPU)-CODES and local analysis codes):**

| <b>Blood test</b>   | <b>NPU/analysis code</b>                                                       |
|---------------------|--------------------------------------------------------------------------------|
| HbA1c               | NPU03835, DNK35249, AAB00091, AAA00740, AAB00061, NPU02307, NPU27300, AAB00092 |
| Creatinine, highest | NPU18016, NPU01807                                                             |
| Platelets, lowest   | NPU03568                                                                       |
| Bilirubin, highest  | NPU 01370                                                                      |

---

**ICU treatment codes:**

| <b>Treatment</b>                         | <b>Danish treatment code</b>                                                   |
|------------------------------------------|--------------------------------------------------------------------------------|
| Mechanical ventilation (respirator)      | BGDA0                                                                          |
| Acute dialysis                           | BJFD0                                                                          |
| Treatment with inotropes or vasopressors | BFHC92A, BFHC92B, BFHC92C, BFHC92D, BFHC92E, BFHC93A, BFHC93B, BFHC93C, BFHC95 |

---
